# Supplementary material
Source: MDPI journal article supplement (https://www.mdpi.com/2076-3417/9/11/2259)
Supplement: s1 [file s1]

**Table S1.** Characteristics of unmodified and modified carbon felts.

| Anode                            | BET SSA (m <sup>2</sup> /g) | Hydrophobicity (°) | Loading mass (g) |
|----------------------------------|-----------------------------|--------------------|------------------|
| Carbon felt                      | 6.2                         | 110                | -                |
| LTA zeolite-modified carbon felt | 13.32                       | 0                  | 0.10             |
| Bentonite-modified carbon felt   | 16.74                       | 0                  | 0.14             |

SSA: Specific Surface Area

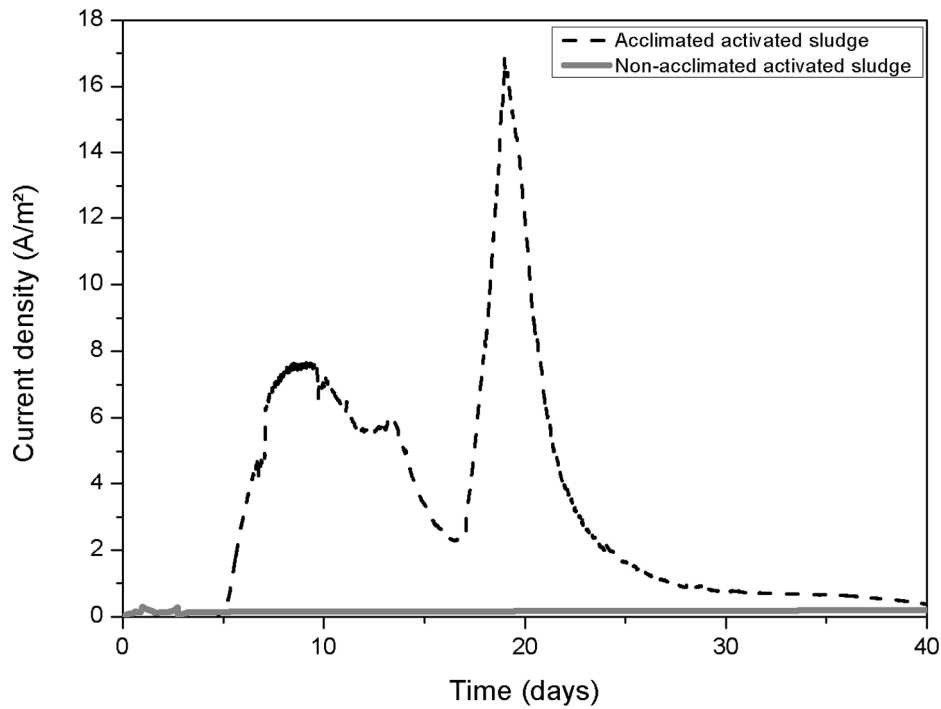

**Figure S1.** Variation of the current density on carbon felt electrodes polarized at -0.2 V vs. SCE in tannery wastewater and 20 mM of acetate inoculated with acclimated activated sludge (dotted line) or non-acclimated activated sludge (solid gray line).
